# Supplementary material for: Thermoregulated phase-transfer iridium nanoparticle catalyst: highly selective hydrogenation of the CO bond for α,β-unsaturated aldehydes and the CC bond for α,β-unsaturated ketones
Source: Royal Society of Chemistry journal article supplement (doi:10.1039/c6cy01137c), 2016-01-01
Supplement: c6cy01137c1.pdf [file c6cy01137c1.pdf]

*Electronic Supplementary Information (ESI) for*

**Thermoregulated phase-transfer iridium nanoparticle catalyst:  
highly selective hydrogenation of C=O bond for  $\alpha$ ,  $\beta$ -unsaturated  
aldehydes while C=C bond for  $\alpha$ ,  $\beta$ -unsaturated ketones**

Wenjiang Li, Yanhua Wang\*, Pu Chen, Min Zeng, Jingyang Jiang and Zilin Jin  
State Key Laboratory of Fine Chemicals, Dalian University of Technology, Dalian  
116024, Liaoning, China

\* Corresponding author. Tel.: +86-411-84986033; fax: +86-411-84986033; E-mail  
address: yhuawang@dlut.edu.cn

**Experimental Details**

**Materials and analyses**

Iridium (III) chloride ( $\text{IrCl}_3$ , 99.9%, metals basis) was purchased from Alfa Aesar. 1-Pentanol was purchased from Kermel. Cinnamaldehyde (CAL) and other substrates were supplied from Alfa Aesar. All these chemical agents were analytical reagents. Thermoregulated ligand  $\text{Ph}_2\text{P}(\text{CH}_2\text{CH}_2\text{O})_n\text{CH}_3$  ( $n = 22$ ) was prepared according to the method reported in the literature.<sup>1</sup> The TEM images were taken with a Philips Tecnai G<sup>2</sup> 20 TEM at an accelerating voltage of 200 kV. Inductively coupled plasma atomic emission spectroscopy (ICP-AES) analyses of metal elements were carried out on Optima 2000DV (Perkin Elmer, USA). Gas chromatography analyses were performed on a Tianmei 7890 GC equipped with a 50 m OV-101 column and an FID detector. GC-MS measurement was performed on a HP 6890 GC/5973 MSD instrument.

**Preparation of the iridium nanoparticle catalyst**

4 mL of aqueous solution of  $\text{IrCl}_3$  ( $6.7 \times 10^{-6}$  mol), 7.82 mg of thermoregulated ligand  $\text{Ph}_2\text{P}(\text{CH}_2\text{CH}_2\text{O})_{22}\text{CH}_3$  ( $6.7 \times 10^{-6}$  mol), 4 mL of 1-pentanol were added in a 75 mL teflon-lined standard stainless-steel autoclave and stirred under hydrogen (4 MPa) at 90 °C for 6 h. Then the reactor was cooled to room temperature and depressurized. The color of the aqueous phase changed from light green to brown, indicating the formation of iridium nanoparticles (Ir-NPs) (see Fig. S3).

**The reversible phase transfer**

The fresh Ir-NPs solution (4 mL) and 1-pentanol (4 mL) were added into a 20 mL Schlenk tube, and then stirred and heated in a 70 °C thermostatic oil bath for several minutes under a nitrogen atmosphere. Soon we would observe the Ir-NPs transfer from aqueous to 1-pentanol. After that, the Schlenk tube was cooled to room temperature for enough time, and the Ir-NPs could transfer from 1-pentanol phase to aqueous phase (see Fig. S4).

**The chemoselective hydrogenation of cinnamaldehyde**

The chemoselective hydrogenation of cinnamaldehyde was carried out in a 75 mL teflon-lined standard stain-steel autoclave immersed in a thermostatic oil bath. The

stirring rate was the same for all experiments. The autoclave was charged with the as-prepared Ir-NPs, water, 1-pentanol, cinnamaldehyde and *n*-decane (as internal standard) and flushed 5 times with 1 MPa H<sub>2</sub>. The reactor was pressurized with H<sub>2</sub> up to the required pressure and held at the scheduled temperature for a fixed length of time. Then, the reactor was cooled to room temperature and depressurized. The upper 1-pentanol phase was carefully removed from the lower aqueous phase by syringe and immediately analyzed by GC and GC-MS.

## Supplementary Figure

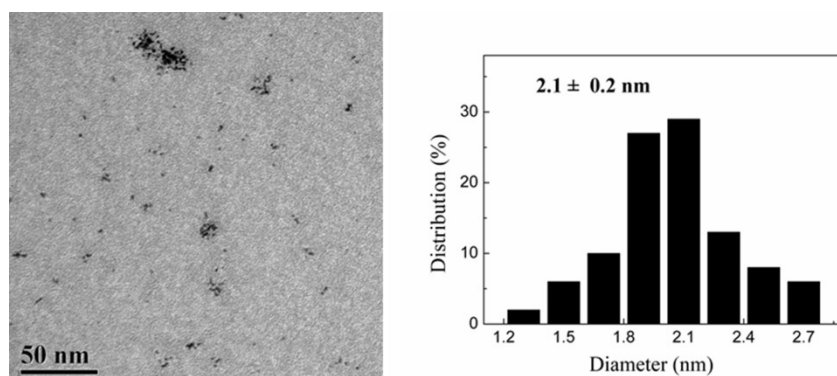

**Fig. S1.** TEM micrograph and particle size histogram of the Ir-NPs after three cycles

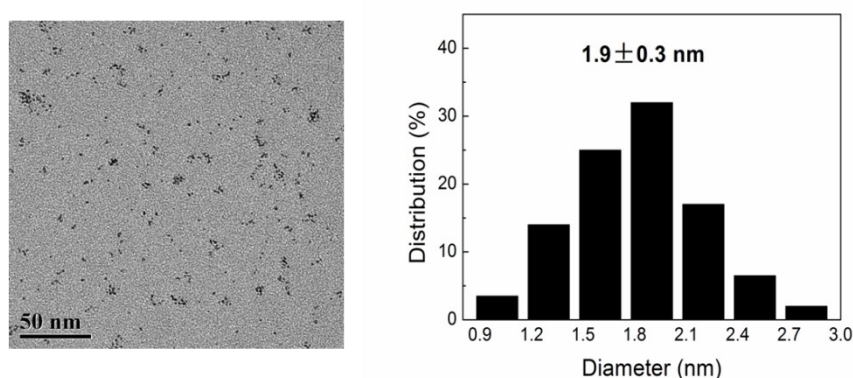

**Fig. S2.** TEM micrograph and particle size histogram of thermoregulated ligand Ph<sub>2</sub>P(CH<sub>2</sub>CH<sub>2</sub>O)<sub>22</sub>CH<sub>3</sub>-stabilized Ir-NPs (Freshly prepared)

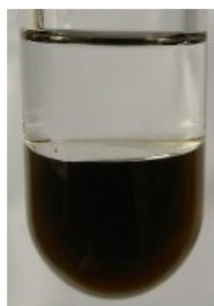

**Fig. S3.** Photograph for the as-prepared Ir-NPs in the aqueous (the lower)/1-pentanol (the upper) biphasic system

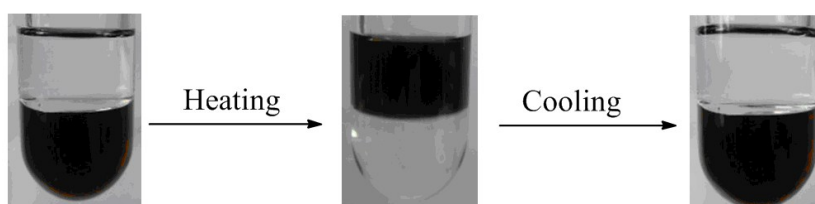

**Fig. S4.** Phase-transfer photographs for the freshly prepared Ir-NPs in the aqueous (the lower)/1-pentanol (the upper) biphasic system

**Table S1** Evaluation of Ir leaching in the reusability experiments

| Cycle number        | 1   | 2   | 3   | 4   | 5   | 6   | 7   |
|---------------------|-----|-----|-----|-----|-----|-----|-----|
| Ir leaching (wt. %) | 6.5 | 2.1 | 1.4 | 1.1 | 0.6 | 0.4 | 0.5 |

**Table S2** The reusability of the as-prepared Ir-NPs for the chemoselective hydrogenation of CAL.<sup>a</sup>

| Entry | Time (min) | Conversion (%) <sup>b</sup> | Selectivity (%) <sup>b,c</sup> |
|-------|------------|-----------------------------|--------------------------------|
| 1     | 30         | 74                          | >99                            |
| 2     | 30         | 74                          | >99                            |
| 3     | 40         | 76                          | >99                            |
| 4     | 90         | 78                          | 99                             |
| 5     | 150        | 77                          | 99                             |
| 6     | 230        | 73                          | 98                             |
| 7     | 390        | 76                          | 98                             |

<sup>a</sup> Reaction conditions: 1-pentanol 4 mL, water 4 mL containing  $6.7 \times 10^{-3}$  mmol Ir-NPs ( $\text{Ph}_2\text{P}(\text{CH}_2\text{CH}_2\text{O})_{22}\text{CH}_3/\text{Ir} = 1$  (molar ratio)), CAL/Ir = 100 (molar ratio), 50 mg of *n*-decane as internal standard, T = 70 °C, 1 MPa H<sub>2</sub>. <sup>b</sup> Determined by GC and GC-MS. <sup>c</sup> Selectivity for cinnamyl alcohol and the main by-product was 3-phenyl-1-propanol.

#### Supplementary References:

1 M. Solinas, J. Jiang, O. Stelzer and W. A. Leitner, *Angew. Chem., Int. Ed.*, 2005, **44**, 2291-2295.
